# Supplementary material
Source: publisher figshare collection journal article supplement (https://karger.figshare.com/ndownloader/files/6487962)
Supplement: Supplementary file 1 [file 6487962]

**Online Supp. Table 1.** Milk and egg allergens: protein sequences, protein fragments after *in silico* digestion, predicted pIC50 values to 12 DRB1 and 5 DQ proteins, known T-cell and IgE epitopes.
